# Supplementary material for: Determination of thermodynamic and transport parameters of naphthenic acids and organic process chemicals in oil sand tailings pond water
Source: Royal Society of Chemistry journal article supplement (doi:10.1039/c3em00089c), 2013-01-01
Supplement: c3em00089c.pdf [file c3em00089c.pdf]

Electronic supplementary information

## **Determination of thermodynamic and transport parameters of naphthenic acids and organic process chemicals in oil sand tailings pond water**

Xiaomeng Wang, Lisa Robinson, Qing Wen and Kim L. Kasperski\*

Address: Natural Resources Canada, 1 Oil Patch Drive, Devon, AB, T9G 1A8, Canada. E-mail: kim.kasperski@nrcan.gc.ca

## **SECTION A: ADSORPTION COEFFICIENTS ( $K_d$ ) FOR SOME MODEL COMPOUNDS ONTO MINERALS**

To obtain  $K_d$  from batch adsorption experiments, a plot of  $C_s$  (concentration of the chemical on the sorbent) vs  $C_{l,2}$  (concentration of the chemical in the liquid) was constructed. The slope of the linear region of the curve at the lower concentration was reported in this study as the final  $K_d$  value obtained from the batch experiments for the model compound.

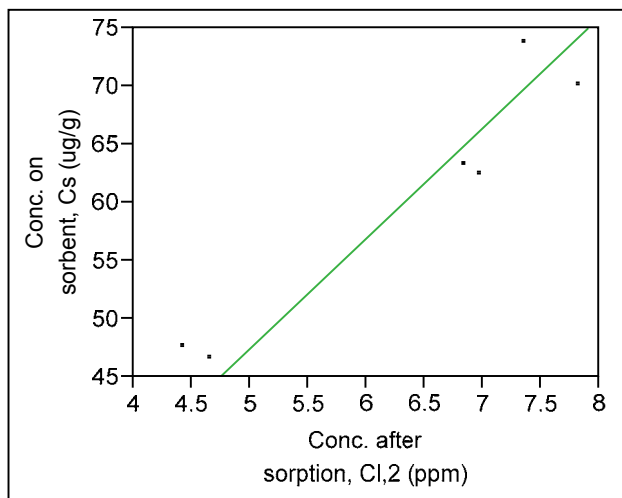

— Linear Fit

**Figure S1** – The adsorption of lauric acid (in 1:1 mixture) onto 2.5% bitumen clay  
**Linear fit**, Conc. on sorbent,  $C_s = 0 + 9.5 * \text{conc. after sorption}, C_{l,2}$

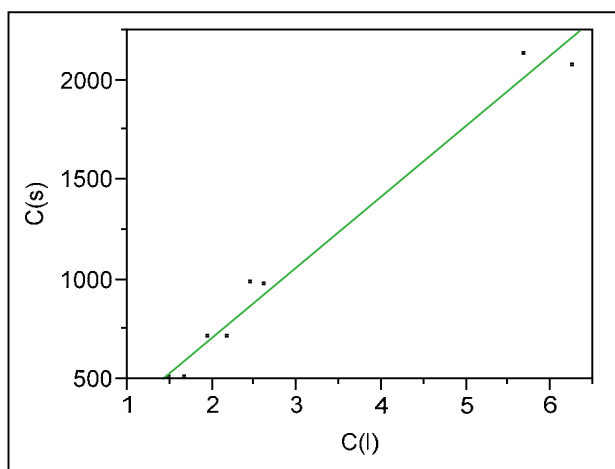

— Linear Fit

**Figure S2** – The adsorption of nonylphenol onto 2.5% bitumen clay  
**Linear fit**, Conc. on sorbent,  $C_s = 0 + 354.6 * \text{Conc. after sorption}, C_{l,2}$

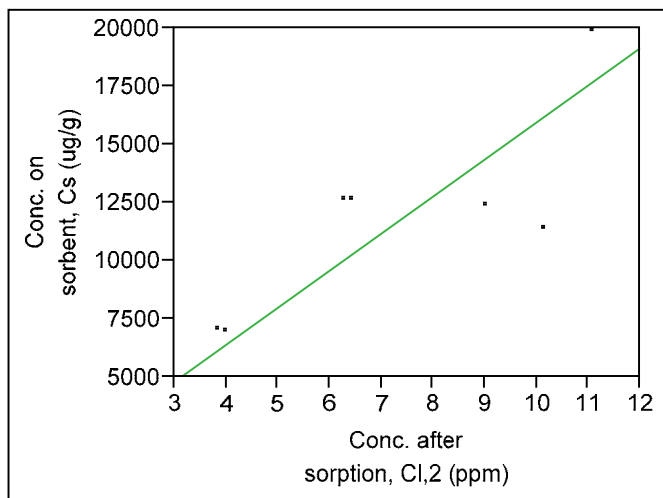

— Linear Fit

**Figure S3** – The adsorption of BAC 14 onto 2.5% bitumen clay  
**Linear fit**,  $\text{Conc. on sorbent, } C_s = 0 + 1594.5 * \text{Conc. after sorption, } C_{l,2}$

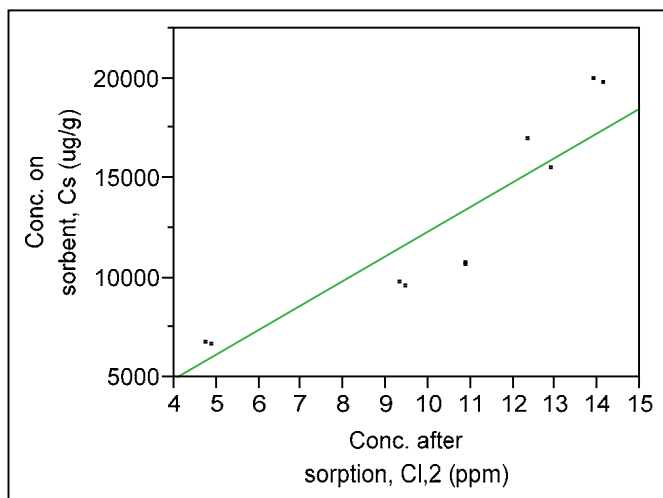

— Linear Fit

**Figure S4** – The adsorption of BAC 14 onto clean clay  
**Linear fit**,  $\text{Conc. on sorbent, } C_s = 0 + 1233.1 * \text{Conc. after sorption, } C_{l,2}$

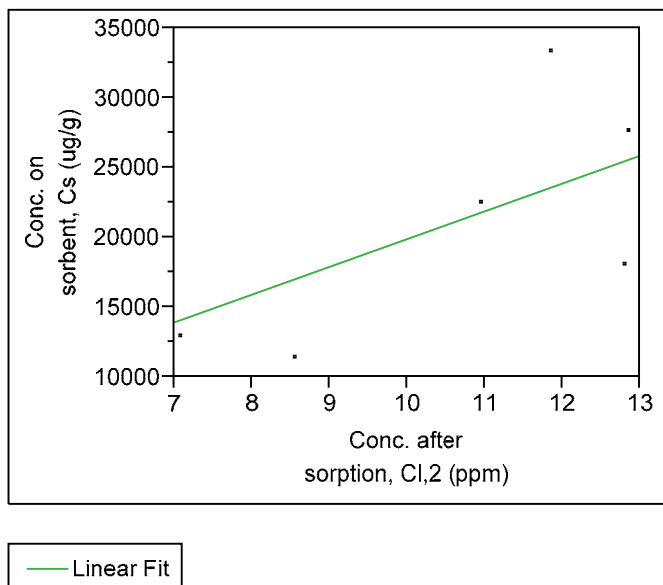

**Figure S5** – The adsorption of BAC 16 onto 2.5% bitumen clay  
**Linear fit**,  $\text{Conc. on sorbent, } C_s = 0 + 1988.7 * \text{Conc. after sorption, } C_{l,2}$

## SECTION B: LINEAR RELATIONSHIP BETWEEN FLOW RATE AND DISPERSION COEFFICIENT

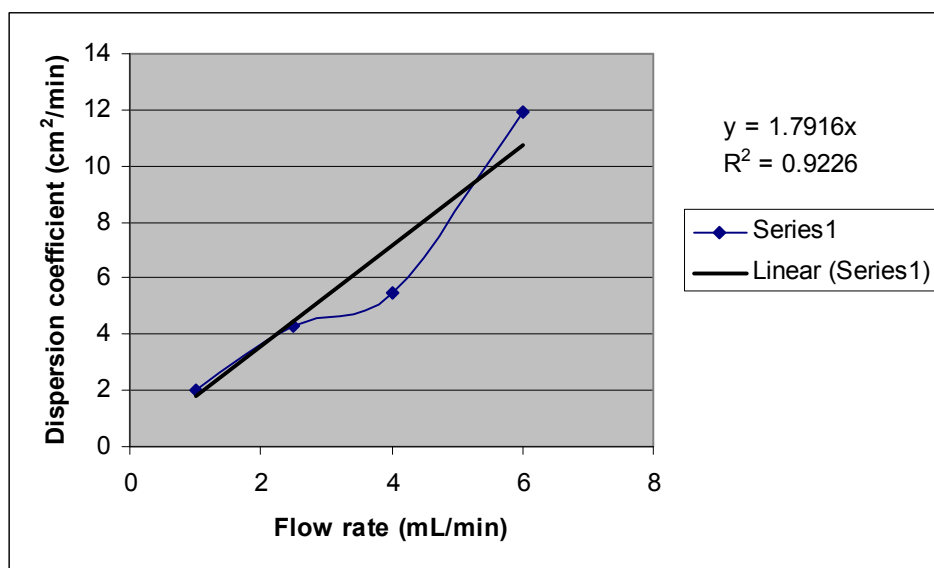

**Figure S6** – The relationship of  $D = \alpha \bar{v}$  based on glass column experiments. For details, refer to the section “Transport case study in an Alberta oil sand mining site” in the main article.

### SECTION C: TRANSPORT EXPERIMENT ON CLEAN SAND COLUMN

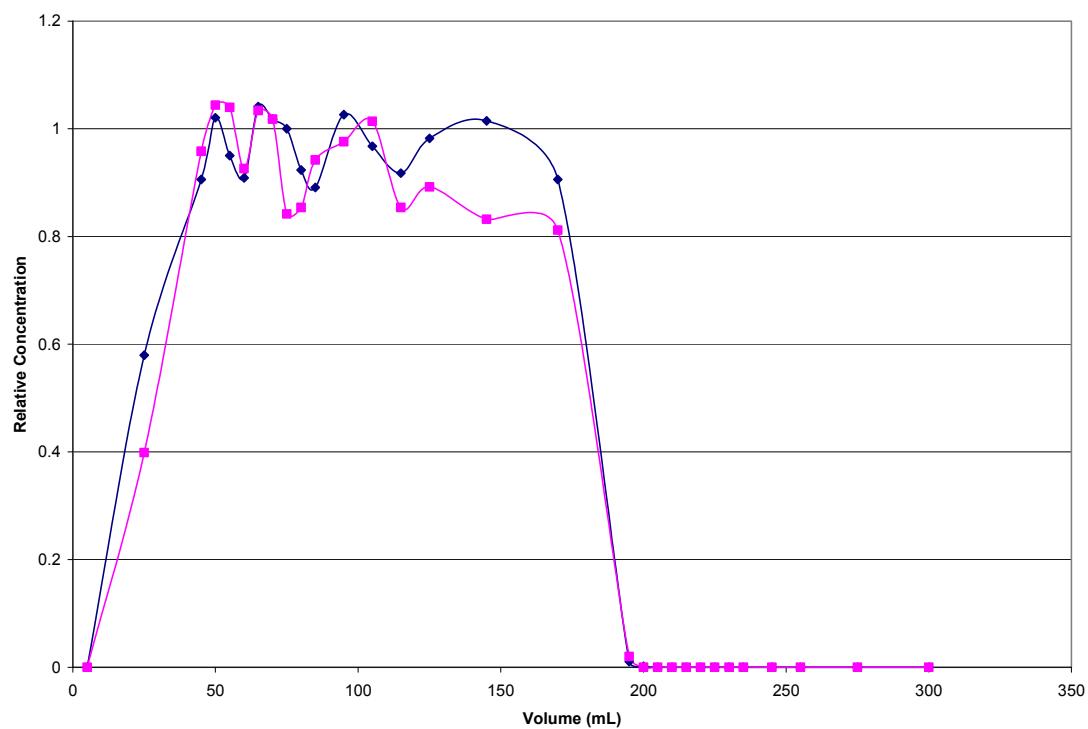

**Figure S7** –150mL PCHCA injected onto a sand column (about 30g) at a flow rate of 4.0mL/min (blue line) and 2.5mL/min (pink line).
